# Supplementary material for: Vibrational properties of graphdiynes as 2D carbon materials beyond graphene
Source: Royal Society of Chemistry journal article supplement (doi:10.1039/d2cp00980c), 2022-01-01

## Supporting Informations

### Vibrational properties of graphdiynes as 2D carbon materials beyond graphene

P. Serafini,<sup>a</sup> A. Milani,<sup>a</sup> M. Tommasini,<sup>b</sup> C. Castiglioni,<sup>b</sup> D.M. Proserpio,<sup>c</sup> C.E. Bottani,<sup>a</sup> C.S. Casari\*<sup>a</sup>

<sup>a</sup> Department of Energy, Politecnico di Milano, Via Ponzio 23/3 20133 Milan, Italy.

<sup>b</sup> Department of Chemistry, Materials and Chem. Eng. 'G.Natta', Politecnico di Milano, Piazza Leonardo da Vinci 32 20133 Milan, Italy.

<sup>c</sup> Dipartimento di Chimica, Università degli Studi di Milano, 20133 Milano, Italy

Table S1. Sketch of the 2D-GDY and 2D-GZY structures analysed. For each structure the unit cell, space group point group symmetry (factor group at  $\Gamma$  point of BZ), number of polyynic chains belonging to the unit cell are illustrated. Energy contribution per carbon atom, referred to graphene ( $\Delta E$ ), bond alternation parameter (BLA) of the polyynic units are reported. (i) in the fourth column indicates that inversion symmetry centres are located on the polyynic chains. The number and symmetry species of the ECC phonons are listed in the table.

| structure                   | unit cell | point group<br>space group | number of chains               | DE (Kcal mol <sup>-1</sup> ) | BLA (Å) | ECC modes                                                    |
|-----------------------------|-----------|----------------------------|--------------------------------|------------------------------|---------|--------------------------------------------------------------|
| 6-H<br>a -GDY               |           | D <sub>6h</sub><br>p6mm    | 3 (i)                          | 27.39                        | 0.142   | 1A <sub>g</sub> +1E <sub>2g</sub>                            |
| 6-L                         |           | D <sub>2h</sub><br>c2mm    | centred: 2<br>primitive: 1 (i) | 26.18                        | 0.136   | 1A <sub>g</sub>                                              |
| 6-R                         |           | D <sub>2h</sub><br>c2mm    | centred: 4<br>primitive: 2(i)  | 25.48                        | 0.154   | 1A <sub>g</sub> +1B <sub>1g</sub>                            |
| 6-HT <sup>2</sup><br>b -GDY |           | D <sub>6h</sub><br>p6mm    | 6                              | 25.40                        | 0.156   | 1A <sub>g</sub> +2E <sub>2g</sub><br>(partial ECC character) |

|                             |                                                                                     |                         |                                |       |       |                                                 |
|-----------------------------|-------------------------------------------------------------------------------------|-------------------------|--------------------------------|-------|-------|-------------------------------------------------|
| 6-hT <sup>2</sup><br>g -GDY | 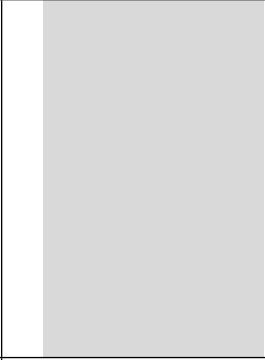   | D <sub>6h</sub><br>p6mm | 3(i)                           | 21.13 | 0.167 | 1A <sub>g</sub> +1E <sub>2g</sub>               |
| 6-hL                        |    | D <sub>2h</sub><br>p2mm | 1(i)                           | 20.59 | 0.138 | 1A <sub>g</sub>                                 |
| 6-hL <sup>2</sup>           |   | D <sub>2h</sub><br>c2mm | centred: 4<br><br>primitive: 2 | 23.11 | 0.136 | 2A <sub>g</sub><br><br>(partial ECC character)  |
| 6-hL <sup>3</sup>           |  | D <sub>2h</sub><br>p2mm | 3<br><br>i(central chain only) | 24.06 | 0.135 | 3 A <sub>g</sub><br><br>(partial ECC character) |

|                    |  |  |                           |                 |       |       |                 |
|--------------------|--|--|---------------------------|-----------------|-------|-------|-----------------|
| 6-h <sup>2</sup> L |  |  | D <sub>2h</sub> /<br>c2mm | centred: 2      | 16.81 | 0.139 | 1A <sub>g</sub> |
|                    |  |  |                           | primitive: 1(i) |       |       |                 |
| 6-h <sup>3</sup> L |  |  | D <sub>2h</sub> /<br>p2mm | 1(i)            | 14.15 | 0.138 | 1 Ag            |

Tabella S2. Computed wavenumbers (spectral region above 700 cm<sup>-1</sup>), symmetry species, relative Raman activities and IR band intensities for the **q=0** Raman or IR active phonons of the GDY and GZY crystals.

| 2D- GDY structures |                                              |                |               |                                              |                                         |
|--------------------|----------------------------------------------|----------------|---------------|----------------------------------------------|-----------------------------------------|
|                    | Raman Spectrum                               |                |               | IR spectrum                                  |                                         |
| System             | wavenumber<br>(cm <sup>-1</sup> )<br>(Irrep) | Raman activity | ECC character | wavenumber<br>(cm <sup>-1</sup> )<br>(Irrep) | IR intensity<br>(km mol <sup>-1</sup> ) |
| <b>6-H</b>         | 831 (E <sub>2g</sub> )                       | 36             |               | 1300 (E <sub>1u</sub> )                      | 1516                                    |
|                    | 1351 (A <sub>1g</sub> )                      | 0              |               | 2219 (E <sub>1u</sub> )                      | 365                                     |
|                    | 1498 (E <sub>2g</sub> )                      | 337            |               |                                              |                                         |
|                    | 2041 (E <sub>2g</sub> )                      | 1000           | ECC           |                                              |                                         |
|                    | 2361 (A <sub>1g</sub> )                      | 0.02           | ECC           |                                              |                                         |

|                         |                   |      |                       |                   |      |
|-------------------------|-------------------|------|-----------------------|-------------------|------|
| <b>6-L</b>              | 1092 ( $B_{1g}$ ) | 11   |                       | 1182 ( $B_{3u}$ ) | 14   |
|                         | 1107 ( $A_g$ )    | 35   |                       | 2260 ( $B_{3u}$ ) | 2    |
|                         | 1531 ( $A_g$ )    | 381  |                       |                   |      |
|                         | 2118 ( $A_g$ )    | 1000 | ECC                   |                   |      |
| <b>6-R</b>              | 1156 ( $A_g$ )    | 386  |                       | 1036 ( $B_{2u}$ ) | 302  |
|                         | 1404 ( $A_g$ )    | 749  |                       | 1254 ( $B_{3u}$ ) | 280  |
|                         | 1541 ( $B_{1g}$ ) | 9    |                       | 2241 ( $B_{3u}$ ) | 267  |
|                         | 2193 ( $A_g$ )    | 1000 | ECC                   | 2269 ( $B_{2u}$ ) | 20   |
|                         | 2202 ( $B_{1g}$ ) | 57   | ECC                   |                   |      |
| <b>6-HT<sup>2</sup></b> | 1014 ( $E_{2g}$ ) | 12   |                       | 754 ( $E_{1u}$ )  | 1    |
|                         | 1181 ( $A_{1g}$ ) | 167  |                       | 1185 ( $E_{1u}$ ) | 1067 |
|                         | 1445 ( $E_{2g}$ ) | 27   |                       | 1452 ( $E_{1u}$ ) | 482  |
|                         | 1448 ( $A_{1g}$ ) | 621  |                       | 2246 ( $E_{1u}$ ) | 1501 |
|                         | 1532 ( $E_{2g}$ ) | 109  |                       | 2356 ( $E_{1u}$ ) | 2    |
|                         | 2240 ( $E_{2g}$ ) | 142  | partial ECC character |                   |      |
|                         | 2240 ( $A_{1g}$ ) | 1000 | ECC                   |                   |      |
|                         | 2255 ( $E_{2g}$ ) | 453  | partial ECC character |                   |      |
| <b>6-hT<sup>2</sup></b> | 790 ( $E_{2g}$ )  | 1    |                       | 893 ( $E_{1u}$ )  | 14   |
|                         | 984 ( $A_{1g}$ )  | 63   |                       | 1429 ( $E_{1u}$ ) | 1045 |
|                         | 1382 ( $E_{2g}$ ) | 3    |                       | 2269 ( $E_{1u}$ ) | 480  |
|                         | 1491 ( $A_{1g}$ ) | 235  |                       |                   |      |
|                         | 1574 ( $E_{2g}$ ) | 134  |                       |                   |      |
|                         | 2277 ( $A_{1g}$ ) | 1000 | ECC                   |                   |      |
|                         | 2337 ( $E_{2g}$ ) | 344  | ECC                   |                   |      |

### 2D-GZY structures

| Raman Spectrum          |                                  |                |                       | IR spectrum                      |                                 |
|-------------------------|----------------------------------|----------------|-----------------------|----------------------------------|---------------------------------|
| System                  | wavenumber ( $cm^{-1}$ ) (Irrep) | Raman activity | ECC character         | wavenumber ( $cm^{-1}$ ) (Irrep) | IR intensity ( $km\ mol^{-1}$ ) |
| <b>6-hL</b>             | 753 ( $B_{2g}$ )                 | 0              |                       | 713 ( $B_{1u}$ )                 | 1                               |
|                         | 899 ( $A_g$ )                    | 0              |                       | 853 ( $B_{3u}$ )                 | 331                             |
|                         | 1342 ( $B_{1g}$ )                | 1000           |                       | 1264 ( $B_{2u}$ )                | 1                               |
|                         | 1482 ( $A_g$ )                   | 47             |                       | 1435 ( $B_{3u}$ )                | 3085                            |
|                         | 1567 ( $A_g$ )                   | 171            |                       | 2255 ( $B_{3u}$ )                | 8719                            |
|                         | 2248 ( $A_g$ )                   | 328            | ECC                   |                                  |                                 |
| <b>6-hL<sup>2</sup></b> | 752 ( $B_{2g}$ )                 | 0              |                       | 715 ( $B_{1u}$ )                 | 1                               |
|                         | 761 ( $B_{2g}$ )                 | 0              |                       | 987 ( $B_{3u}$ )                 | 0                               |
|                         | 1000 ( $A_g$ )                   | 5              |                       | 1208 ( $B_{2u}$ )                | 1                               |
|                         | 1206 ( $B_{1g}$ )                | 3              |                       | 1339 ( $B_{3u}$ )                | 99                              |
|                         | 1296 ( $B_{1g}$ )                | 3              |                       | 1563 ( $B_{3u}$ )                | 64                              |
|                         | 1357 ( $A_g$ )                   | 55             |                       | 2255 ( $B_{3u}$ )                | 584                             |
|                         | 1531 ( $A_g$ )                   | 223            |                       | 2310 ( $B_{3u}$ )                | 58                              |
|                         | 1559 ( $A_g$ )                   | 400            |                       |                                  |                                 |
|                         | 2205 ( $A_g$ )                   | 1000           | partial ECC character |                                  |                                 |

|                         |                   |      |                       |                   |        |
|-------------------------|-------------------|------|-----------------------|-------------------|--------|
|                         | 2244 ( $A_g$ )    | 358  | partial ECC character |                   |        |
| <b>6-hL<sup>3</sup></b> | 753 ( $A_g$ )     | 0    |                       | 705 ( $B_{3u}$ )  | 938    |
|                         | 757 ( $B_{2g}$ )  | 0    |                       | 716 ( $B_{1u}$ )  | 1      |
|                         | 765 ( $B_{2g}$ )  | 0    |                       | 753 ( $B_{1u}$ )  | 0      |
|                         | 1040 ( $A_g$ )    | 8    |                       | 1037 ( $B_{3u}$ ) | 15583  |
|                         | 1177 ( $B_{1g}$ ) | 633  |                       | 1175 ( $B_{2u}$ ) | 0      |
|                         | 1258 ( $B_{1g}$ ) | 890  |                       | 1183 ( $B_{2u}$ ) | 1      |
|                         | 1305 ( $A_g$ )    | 31   |                       | 1288 ( $B_{3u}$ ) | 55108  |
|                         | 1501 ( $A_g$ )    | 84   |                       | 1439 ( $B_{3u}$ ) | 11410  |
|                         | 1549 ( $A_g$ )    | 359  |                       | 1574 ( $B_{3u}$ ) | 8304   |
|                         | 1563 ( $A_g$ )    | 42   |                       | 2219 ( $B_{3u}$ ) | 444    |
|                         | 2173 ( $A_g$ )    | 1000 | ECC                   | 2256 ( $B_{3u}$ ) | 248804 |
|                         | 2245 ( $A_g$ )    | 107  | C <sup>o</sup> C str  | 2292 ( $B_{3u}$ ) | 88     |
|                         | 2313 ( $A_g$ )    | 15   | ECC                   |                   |        |
| <b>6-h<sup>2</sup>L</b> | 728 ( $A_g$ )     | 1    |                       | 735 ( $B_{1u}$ )  | 1      |
|                         | 736 ( $B_{2g}$ )  | 0    |                       | 1288 ( $B_{3u}$ ) | 83     |
|                         | 1228 ( $A_g$ )    | 16   |                       | 1366 ( $B_{2u}$ ) | 0      |
|                         | 1325 ( $B_{1g}$ ) | 5    |                       | 1567 ( $B_{3u}$ ) | 271    |
|                         | 1443 ( $B_{1g}$ ) | 71   |                       | 2250 ( $B_{3u}$ ) | 640    |
|                         | 1567 ( $A_g$ )    | 9    |                       |                   |        |
|                         | 1577 ( $A_g$ )    | 856  |                       |                   |        |
|                         | 2257 ( $A_g$ )    | 1000 | ECC                   |                   |        |
| <b>6-h<sup>3</sup>L</b> | 737 ( $B_{2g}$ )  | 0    |                       | 720 ( $B_{1u}$ )  | 1      |
|                         | 1089 ( $A_g$ )    | 2    |                       | 1086 ( $B_{3u}$ ) | 16     |
|                         | 1385 ( $B_{1g}$ ) | 116  |                       | 1359 ( $B_{2u}$ ) | 0      |
|                         | 1458 ( $A_g$ )    | 13   |                       | 1419 ( $B_{3u}$ ) | 86     |
|                         | 1498 ( $B_{1g}$ ) | 1000 |                       | 1437 ( $B_{2u}$ ) | 0      |
|                         | 1587 ( $A_g$ )    | 371  |                       | 1614 ( $B_{3u}$ ) | 192    |
|                         | 1612 ( $A_g$ )    | 81   |                       | 2247 ( $B_{3u}$ ) | 512    |
|                         | 2224 ( $A_g$ )    | 387  | ECC                   |                   |        |

Tabella S3. Sketches of the vibrational eigenvectors associated to the main active Raman and IR phonons discussed in the main text. Associated wavenumbers and irreducible representations are also reported for each phonon.

| System     | Wavenumber (cm <sup>-1</sup> ) | Irrep |
|------------|--------------------------------|-------|
| <b>6-R</b> |                                |       |

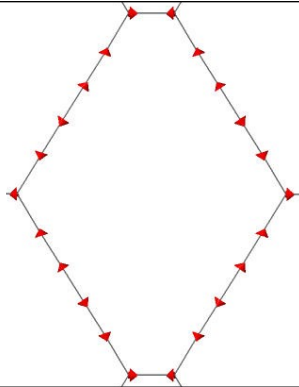

1156

$A_g$

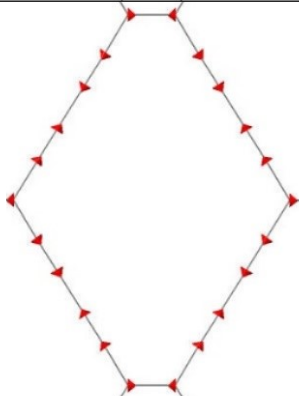

1404

$A_g$

$6-HT^2$

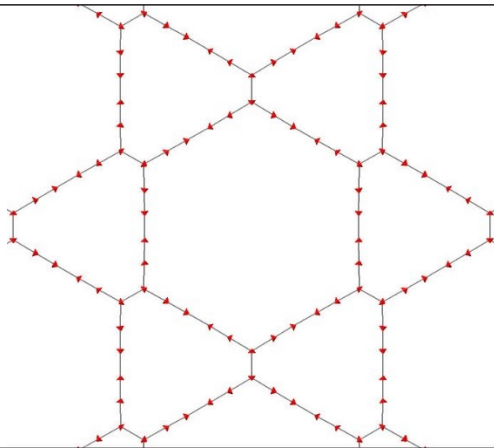

1181

$A_{1g}$

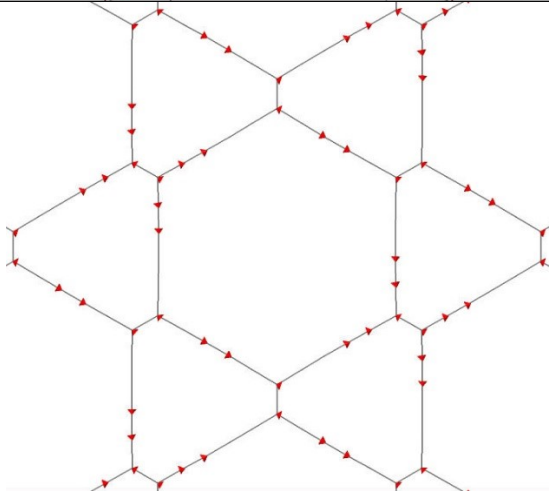

1185

$E_{1u}$

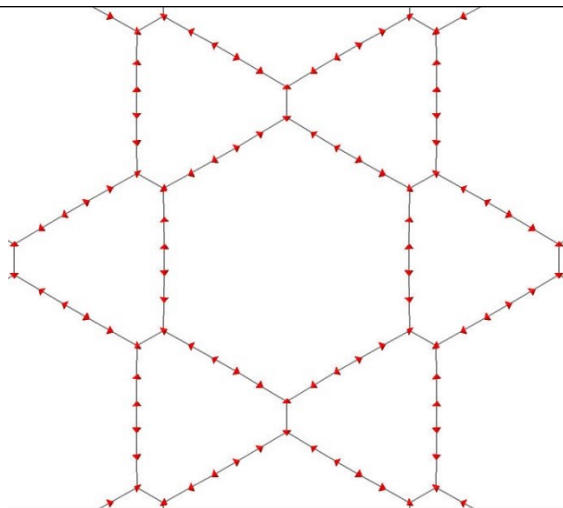

1448

$A_{1g}$

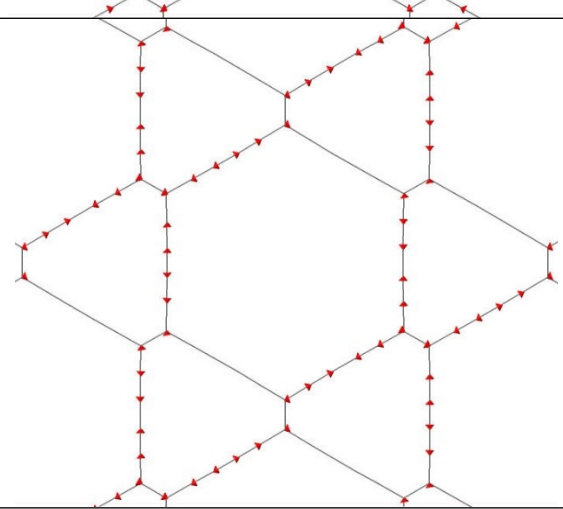

1452

$E_{1u}$

$6-hT^2$

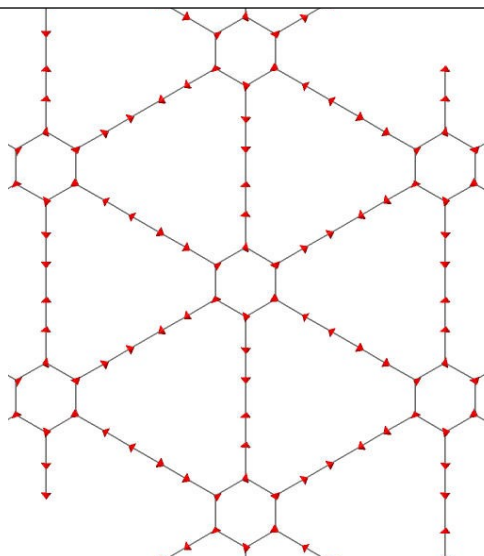

1382

$E_{2g}$

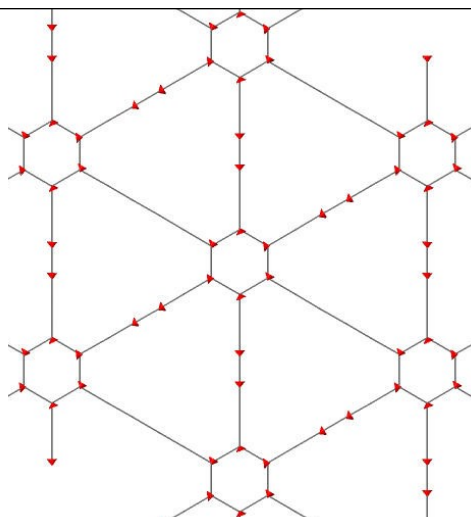

1429

$E_{1u}$

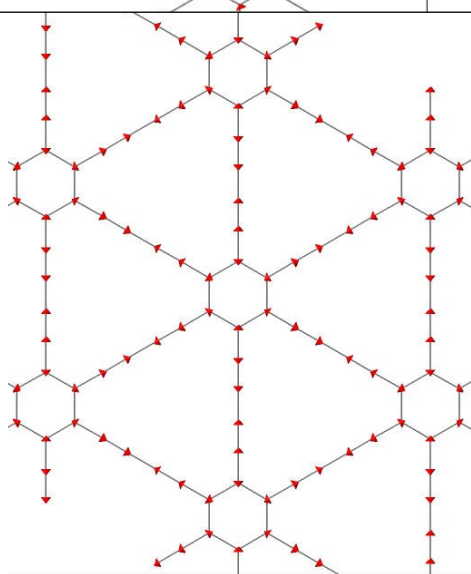

1491

$A_{1g}$

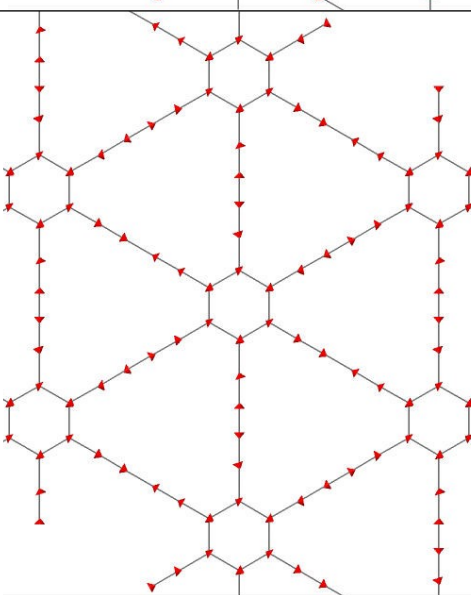

1574

$E_{2g}$

6-H



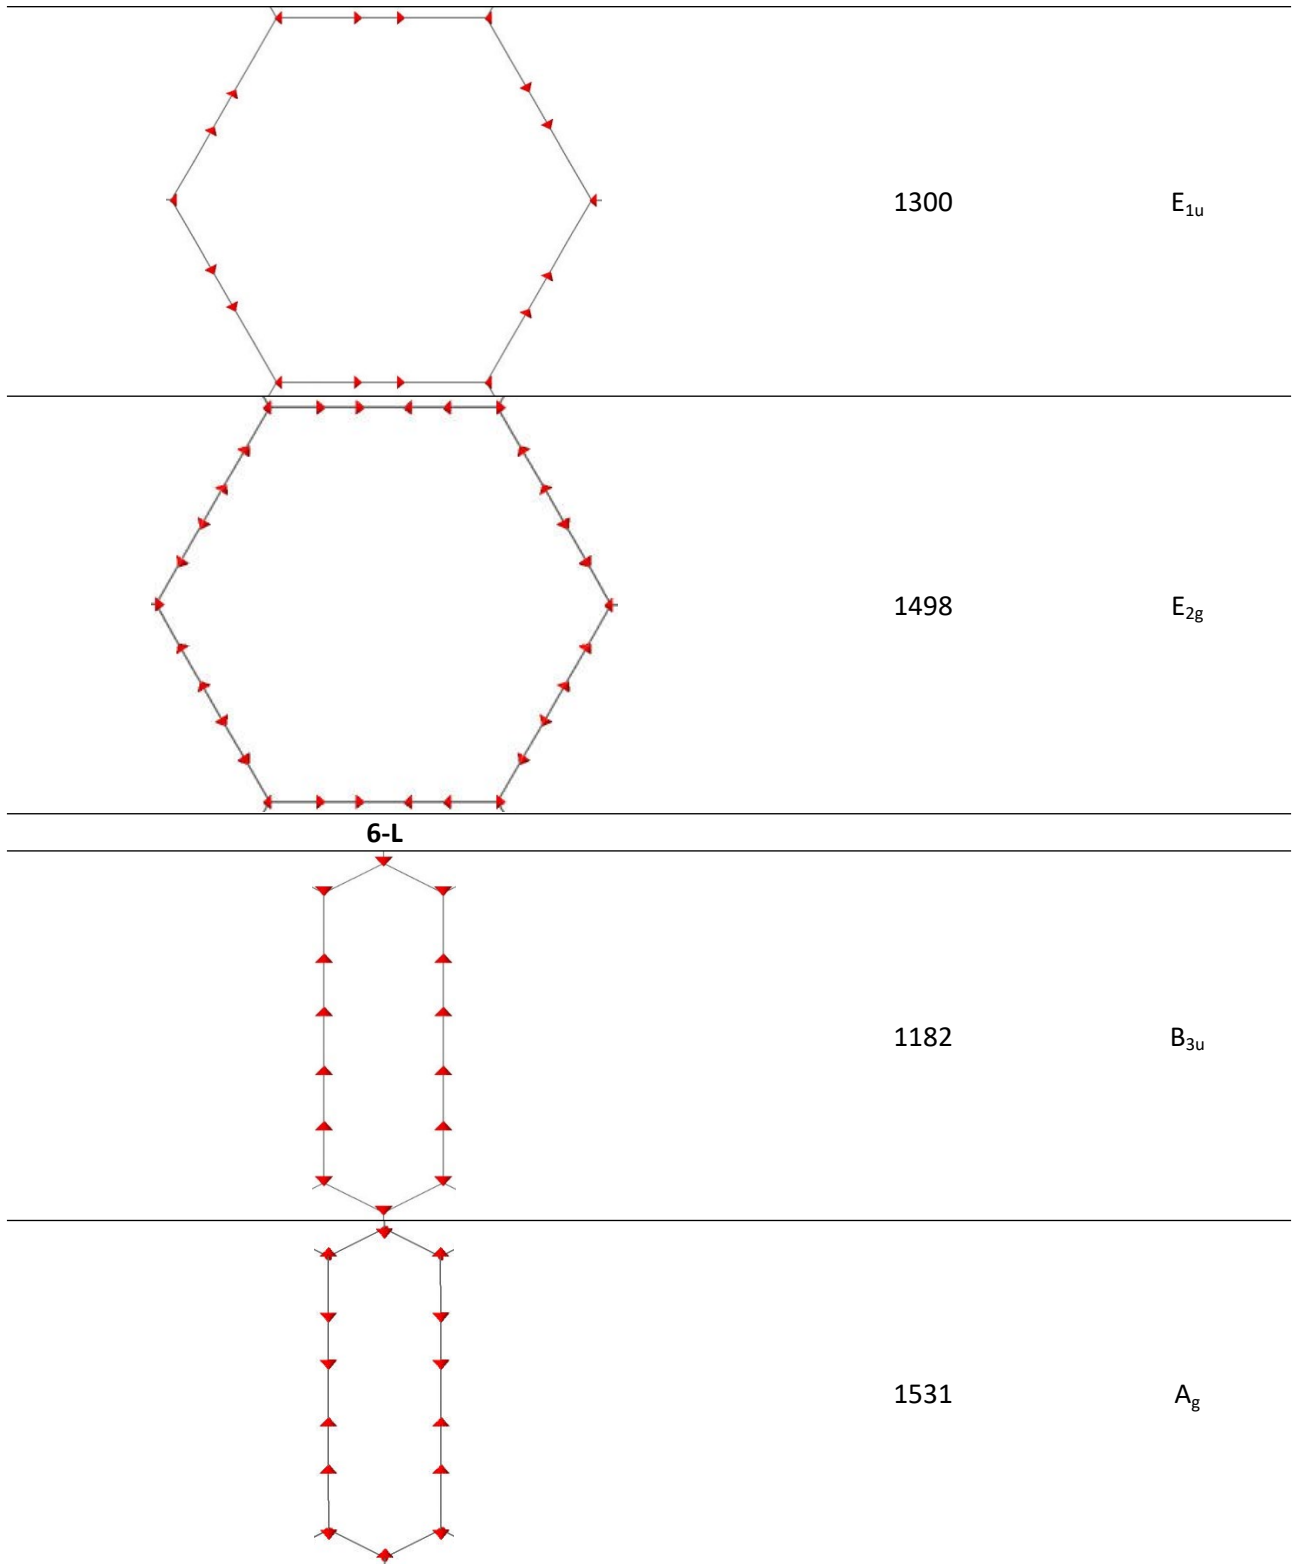

Supplement: d2cp00980c1.pdf [file d2cp00980c1.pdf]
